# Supplementary material
Source: Springer Nature journal article supplement (https://www.springermedizin.de/resource/supplementary/13550_2012_54_MOESM4_ESM.pdf/9687512)

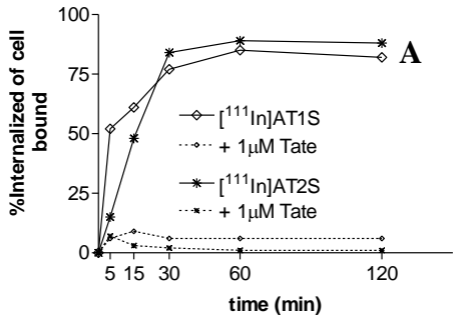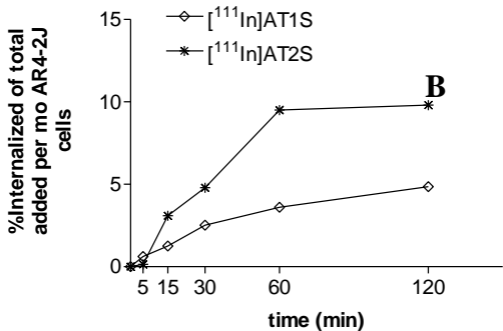

Supplement: MOESM4 [file 9687512]
